# Supplementary material
Source: Research Square preprint supplement (doi:10.21203/rs.3.rs-9074085/v1)
Supplement: Supplementary file 1 [file 4d8d18bb12fcb42140f58ae9.docx]

**Electronic Neuromuscular Stimulation versus intermittent pneumAtic compression devices for the pRevention of venous thromboembolic disease in critically Ill Adults: a randomised feasibility study.**

**Short title: The ENSARIA Trial**

**Sponsor’s Reference:** B01316

**Date: 13th May 2024**

**Version:** 1.6

**Trial Registration:** ClinicalTrials.gov NCT05208216

**Funder**  Health Innovation Manchester: Real World Evaluation Fund

FirstKind Ltd.

**Primary Sponsor** Manchester University NHS Foundation Trust

Division of Research & Innovation, Nowgen Building, Grafton Street, Manchester, M13 9WL

**Ethics Reference:** 22/SC/0098

**IRAS ID:** 284315

**Chief Investigator:** Dr Jonathan Bannard-Smith

Dept of Adult Critical Care, First Floor Purple Zone,

Manchester Royal Infirmary, Oxford Road, Manchester

**Investigational Device:** gekoTM

**Authors:** Dr Jonathan Bannard-Smith, Consultant in Adult Critical Care

Miss Natalie Fowler, Senior Critical Care Scientist

**Confidentiality Statement**

The information contained in this document is privileged and confidential may not be disclosed, except to the extent necessary to obtain informed consent and institutional approval to conduct the study, or as required by governmental authorities. Persons to whom the information is disclosed must be informed that the information is confidential and may not be further disclosed by them.

**PROTOCOL COMPLIANCE DECALRATION**

The undersigned confirm that the following protocol has been agreed and accepted and that the Chief Investigator agrees to conduct the study in compliance with the approved protocol and will adhere to the principles outlined in the Declaration of Helsinki, the Sponsor’s SOPs, and other regulatory requirement.

I agree to ensure that the confidential information contained in this document will not be used for any other purpose other than the evaluation or conduct of the investigation without the prior written consent of the Sponsor.

I also confirm that I will make the findings of the study publicly available through publication or other dissemination tools without any unnecessary delay and that an honest accurate and transparent account of the study will be given; and that any discrepancies from the study as planned in this protocol will be explained.

**For and on behalf of the Study Sponsor:**

**Signature:**

**…................................................. Date: 11/03/2022**

**Name (please print):**

**Lynne Webster**

**Position: Head of the Research Office**


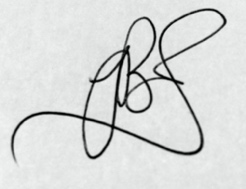
**Chief Investigator:**

**Signature: ..........................** **................................................ Date: .. 11/03/2022**

**Name: (please print):**

**...............J Bannard-Smith............................................................................**

**This protocol has regard for the HRA guidance.**

| **TABLE OF CONTENTS** | **PAGE** |
| --- | --- |
| TITLE PAGE | 1 |
| HRA PROTOCOL COMPLIANCE DECLARATION | 2 |
| LIST OF CONTENTS | 3 |
| STUDY SUMMARY | 4 |
| KEY STUDY CONTACTS | 5 |
| PROTOCOL APPROVAL SIGNATURE PAGE | 6 |
| INVESTIGATOR’S SIGNATURE | 7 |
| SECTION HEADINGS |  |
| 1. INTRODUCTION | 8 |
| 1. STUDY OBJECTIVES | 10 |
| 1. STUDY DESIGN | 11 |
| 1. STUDY SCHEDULE | 12 |
| 1. PARTICIPANT COMPLETION & WITHDRAWAL | 16 |
| 1. STUDY TREATMENTS | 17 |
| 1. DATA COLLECTION | 17 |
| 1. STATISTICAL ANALYSIS | 18 |
| 1. REPORTING OF ADVERSE EVENTS AND DEVICE DEFICIENCIES | 20 |
| 1. DIRECT ACCESS TO SOURCE DATA/DOCUMENTATION | 22 |
| 1. QUALITY CONTROL & ASSURANCE | 23 |
| 1. ETHICS AND REGULATORY REQUIREMENTS | 24 |
| 1. DATA HANDLING & RECORD KEEPING | 25 |
| 1. REFERENCES | 27 |
| 1. APPENDICES | 28 |

**STUDY SUMMARY**

| **Study Title** | Electronic Neuromuscular Stimulation versus intermittent pneumAtic compression devices for the pRevention of venous thromboembolic disease in critically Ill Adults: a randomised feasibility study. |
| --- | --- |
| **Internal ref. no. (or short title)** | The ENSARIA Trial |
| **Study Design** | Open label, parallel group, randomised feasibility trial |
| **Study Participants** | New patients admitted to critical care at risk of venous thromboembolism |
| **Planned Size of Sample (if applicable)** | 40 participants (20 each arm) |
| **Follow up duration (if applicable)** | 90 days |
| **Planned Study Period** | 18 months (6-12 months of recruitment) |
| **Research Question/Aim(s)** | Is it feasible to identify and enrol eligible critically ill adults and apply the Geko device reliably, compared to existing measures used to reduce the risk of venous thromboembolism? |

*This project will be conducted in accordance with the study protocol and the ethical principles outlined by Good Clinical Practice (GCP) and the Declaration of Helsinki in its most current version.*

**KEY STUDY CONTACTS**

**Sponsor Contact**

Dr Lynne Webster

Head of the Research Department

Research & innovation Division

The Nowgen Building

Manchester University NHS Foundation Trust

Grafton Street

Manchester, M13 9WL

Tel: 00 44 (0)161 701 2690

Email: Research.Sponsor@mft.nhs.uk

**Funder Contact**

Mr Richard Deed

Associate Director for Industry

Health innovation Manchester

CityLabs 1.0

Nelson Street

Manchester, M13 9NQ

Tel: +44 (0)161 509 3840

Email: [Richard.Deed@healthinnovationmanchester.com](mailto:Richard.Deed@healthinnovationmanchester.com)

**Study Contact**

Dr Jonathan Bannard-Smith

Consultant in Adult Critical Care & Anaesthesia

Dept of Critical Care

Manchester Royal Infirmary

Oxford Road

Manchester, M13 9WL

TeL: 0161 276 6777

Email: j.bannardsmith@mft.nhs.uk

**PROTOCOL APPROVAL SIGNATURES**

We, the undersigned, have reviewed this protocol and agree that it contains all relevant information required to meet GCP and all applicable regulatory guidelines and statutes.

| 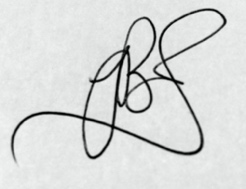 |  | 28th February 2022 |
| --- | --- | --- |

Chief Investigator Date

**Dr Jonathan Bannard-Smith**

Consultant Critical Care & Anaesthesia

Manchester Royal Infirmary

Manchester University NHS Foundation Trust

Oxford Road

Manchester

M13 9WL

| 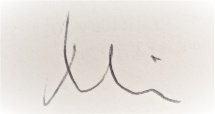Duncan Bain |  | 3rd February 2022 |
| --- | --- | --- |

Statistician Date

**INVESTIGATOR SIGNATURE PAGE**

I have read the protocol specified above and agree to participate in and comply with the procedures, as outlined herein for the conduct of this clinical study. I also agree to comply with the Investigational Review Board (IRB) requirements for testing on human patients. I agree to ensure that the requirements for obtaining informed consent are met.

| 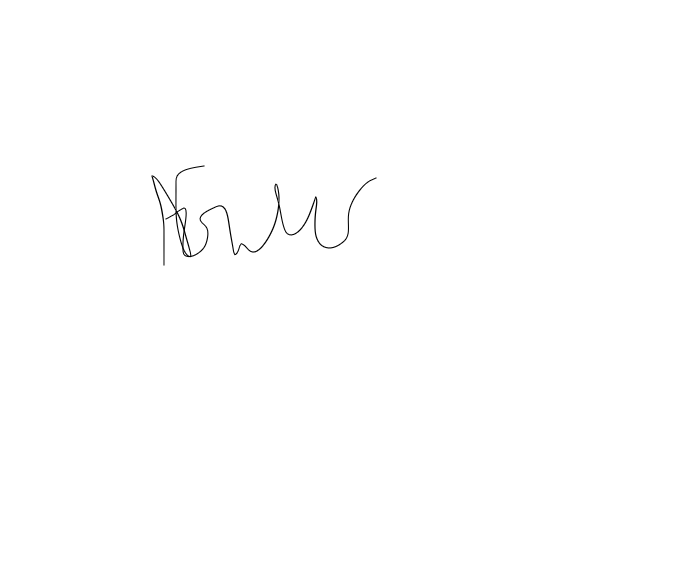 |  | 28/02/2022 |
| --- | --- | --- |
| Investigator’s Signature |  | Date |
| **Miss Natalie Fowler**  Critical Care Scientist |  |  |

**1. Introduction**

**1.1 Venous thromboembolic disease**

Venous thromboembolism (VTE) is the development of blood clots, usually in the deep veins of the lower limbs. Whilst this causes obstruction to venous flow back to the heart in the first instance, the most dangerous consequence is part of the clot breaking away and flowing into the lungs, causing a pulmonary embolism. Pulmonary embolism (PE) is a life-threatening condition that is common in hospitalised patients. Autopsy studies have detected PE in up to 27% of patients with critical illness, of which only 1 in 3 had been clinically diagnosed before death.(1)

Bedside ultrasonography using colour Doppler imaging is a recognised imaging technique used to diagnose deep vein thrombosis (DVT). Routine prospective use of ultrasound has identified as many as 1 in 3 medical patients in intensive care have a DVT.(2) More than 10% of these patients will go on to develop a life-threatening pulmonary embolus. In the past year, meta-analysis of published data have shown VTE to be very common in patients with COVID-19, leading to a higher risk of death for these patients.(3) The total cost burden (direct and indirect costs) to the UK of management of VTE is estimated at approximately £640 million.(4)

**1.2 Mechanical prophylaxis against venous thromboembolism**

Pharmacological prophylaxis is the principal effective means to reduce the risk of VTE in hospitalised patients. However, agents such as low-molecular weight heparin (LMWH) may be contra-indicated and carry considerable risks of side-effects such as bleeding. Mechanical VTE prophylaxis measures include graduated compression stockings (GCS) and intermittent pneumatic compression (IPC) devices. Compression stockings are not suitable for patients with vascular disease and diabetes, often rendering them contra-indicated for patients in critical care. IPCs passively squeeze the patient’s lower leg to stimulate blood flow through the deep veins of the leg using a pneumatic pump. They are single patient use, connected to a reusable mains-powered control unit. This control unit requires disinfection between patients and ongoing maintenance. IPCs are considerably cumbersome and poorly tolerated by many patients. They also present safety challenges to healthcare staff when transferring patients around the hospital for surgery or imaging investigations etc. Both compression stockings and IPCs are currently contra-indicated or poorly tolerated by many patients admitted to critical care. Indeed, evidence from large randomised controlled trials has suggested neither IPCs nor GCS provide any significant reduction in risk for hospitalised patients at moderate to severe risk of VTE.(5, 6)

**1.3 Rationale for innovation**

Blood flow through the leg veins is usually propelled by regular contraction of muscles, particularly those in the calf. In health, walking and associated activities of daily living easily facilitate this venous flow. Hospitalised patients, however, are often immobilised by their illness, none more so than those suffering critical illness requiring admission to intensive care.

Key muscles in the calf, including tibialis, peroneus longus and the lateral gastrocnemius are innervated by the common peroneal nerve. This nerve is found superficially in the skin just below and lateral to the knee joint. Transcutaneous electrical stimulation of the nerve at this point results in contraction of these calf muscles.

**1.4 A proposed innovation: the geko**™ **device**

The geko is a small, battery-powered device, approximately the size of a wrist watch, that adheres to the back of the knee and electrically stimulates the common peroneal nerve (see figure 1). This causes rhythmic contraction of calf muscles and subsequent movement of venous blood around the body equivalent to 60-70% of that achieved by walking. It utilises very low currents,

contrasting with other means of neuromuscular stimulation, such as TENS, making the geko far more comfortable for patients to wear.

Studies to evaluate the geko’s mode of action have been undertaken, focusing on the physiological effects seen in hospitalised patients. These were funded by Innovate UK, (projects: 48547, 78890).

This independent research showed the geko simultaneously offers the following benefits:

- Venous flow increased by a factor of 4(7)
- Arterial and microcirculatory flow increased by a factor of 2(8)
- Ejection fraction (blood flow through the heart) increased by 17%
- Urine output doubled in kidney transplant patients(9)
- Peri-operative and trauma-induced oedema reduced by half(10)

The most compelling effect is the increase in venous blood flow, which is known to reduce the risk of patients developing VTE.


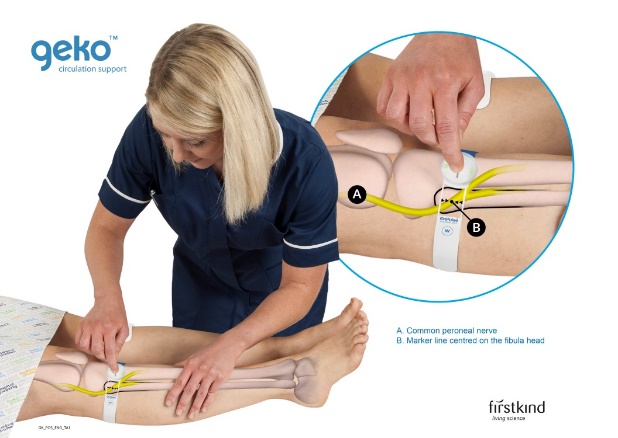

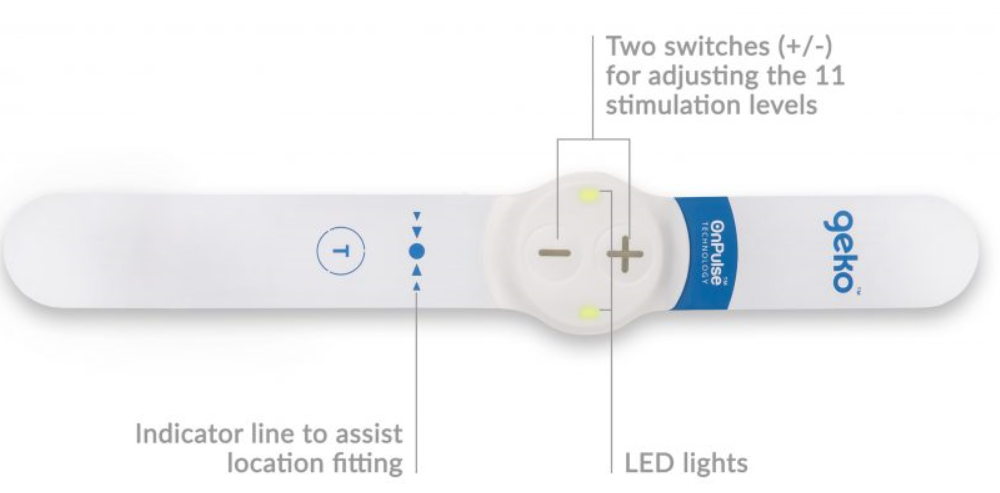


***Figure 1:*** *Application of the geko device over the anatomical location of a patient’s common peroneal nerve.*

**2 Study Objectives**

The primary objective of this trial is to show feasibility of a trial to compare application of the gekoTM device compared to intermittent pneumatic compression stockings in patients admitted to critical care.

The secondary objective is to collect pilot data for relevant outcomes, which may then be used to design and adequately power a future efficacy trial.

**2.1 Relevant Outcomes**

**2.1.1 Feasibility outcomes:**

- Rate of successful application and continuous utility of the geko device, measured through repeated assessment by bedside nurses on whether they can see repetitive twitching of the calf muscles bilaterally (minimum of four assessments every 24 hours).
- Recruitment rate of participants
- Adherence to the interventions, including qualitative reasons for intolerance
- Completeness of data collected for key secondary outcomes
- Rate of loss to follow-up
- Qualitative data on reasons for:
  - Low screening to enrolment ratios
  - device failure
  - lack of clinical utility for both interventions

**2.1.2 Patient-centred outcomes:**

- Incidence of new deep vein thrombosis (DVT), identified through repeat diagnostic doppler ultrasound imaging (baseline and days 5-10)
- Patient reported outcome measures (PROMS) through a semi-structured questionnaire on the comfort and acceptability of the interventions
- Survival to discharge from hospital
- Length of stay in hospital
- Safety assessed by Adverse Events (AEs) and Serious Adverse Events (SAEs)

**2.1.3 Exploratory Physiological Outcomes:**

- Cardiovascular parameters, including vital signs and non-invasive bedside measures of cardiac output. The latter will be measured using analysis of existing continuous arterial pressure waveform
- Serum measures of kidney function (creatinine), thrombosis risk (D-dimer), heart failure (nitro-brain naturetic peptide) and systemic inflammation
- Blood flow velocity and volume in lower limbs, measured by expert doppler ultrasound imaging at baseline and days 5-10

**3 Study Design**

This is an open label, single centre, prospective, interventional randomised feasibility trial. A schematic of the study design is presented in Figure 2.


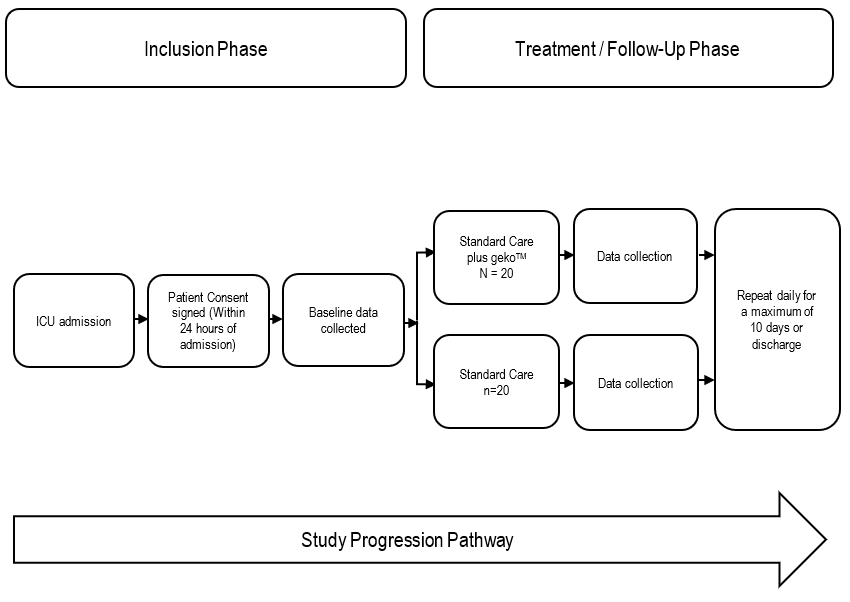


**Figure 2.** Schematic of study design.

**3.1 Study Population**

Adult patients who are being admitted to critical care at Manchester Royal Infirmary.

**3.1.1 Number of Participants**

This study will enrol 40 participants. 20 participants will be allocated standard care utilising IPC devices (control group) and 20 patients will be allocated standard care plus application of the Geko device.

**3.1.2 Study Setting**

Adult critical care areas at the Oxford Road Campus of Manchester University NHS Foundation Trust.

**3****.1.2 Inclusion Criteria**

- Male or female aged ≥ 18 years.
- Intact healthy skin at the proposed site of gekoTM device application.
- Within 24 hours of their admission to critical care
- Expected to remain in critical care until the day after tomorrow

**3.1.3 Exclusion Criteria**

- Use of any concurrent neuro-modulation drug or device (e.g. neuromuscular blocking agents).
- Trauma to the lower limbs that would prevent geko™ from stimulating the common peroneal nerve.
- BMI > 40, or, body mass > 160 Kg.
- Inability to palpate the fibula head in order to apply geko device effectively
- Inability to obtain valid written consent from the participant or their designated legal representative

Consent forms and patient questionnaires will be available in English and common first-languages spoken by the community of Greater Manchester, including Urdu, Chinese and Bengali. All individuals will be considered for inclusion in this study regardless of age, disability, gender reassignment, marriage and civil partnership, pregnancy and maternity, race, religion and belief, sex, and sexual orientation except where the study inclusion and exclusion criteria EXPLICITLY state otherwise.

1. **Study Schedule**

**4.1 Screening procedures**

Members of the participating site research team will screen the critical care electronic patient records (EPR) daily for new admissions meeting eligibility criteria. Patients who meet all inclusion criteria but excluded according to exclusion criteria, will be entered into the screening log. Screening logs with be reviewed monthly by the chief investigator to monitor screening: enrolment ratios and identify any recurring issues preventing enrolment.

**4.2 Consenting procedures**

**4.2.1 Informed consent from the participant**

Patients who possess the capacity to provide informed written consent to participate will be approached by a designated member of the research team. They will be provided with a verbal overview of the trial and what participation would involve. They will also be given a participant information sheet (PIS) and time to consider this information and ask any questions. If they are willing to participate, they will be asked to sign the written consent form before recruitment proceeds. If a participant subsequently loses mental capacity, their original consent will remain valid and they will continue participation in the study.

**4.2.2 Declaration to support enrolment from a consultee**

Many critically ill patients lack the capacity to consent due to factors such as the severity of their illness or the necessary therapies being provided (e.g. sedation for mechanical ventilation). In these situations, we will approach a close relative or friend of the patient, known as their personal consultee. Similar procedures will be followed as in 4.2.1, where the personal consultee will be provided with a verbal overview of the trial and what participation would involve for their friend or relative. They will also be given a specific information sheet for consultees and time to consider this information and ask any questions. If, in their view, the patient would support participation in the trial then the personal consultee will be asked to sign a form of declaration to allow enrolment to proceed.

Where a personal consultee is unavailable, unwilling to engage in this process or does not exist, then the patient’s treating physician, who is not a member of the research team, may provide a declaration for enrolment as the patient’s nominated consultee. This clinician will be given a verbal overview of the trial and what participation would involve along with a copy of the consultee information sheet. If they are happy for enrolment to proceed, they will be asked to sign the declaration form as the patient’s nominated consultee.

**4.2.3 Use of witnessed consultation via telephone**

NHS hospitals have recently been forced to introduce visiting restrictions for patients’ friends and relatives due to COVID-19. This presents a significant barrier to obtaining consent from a patient’s personal consultee. To overcome this, where visiting restrictions are in place, the study investigator (or appropriate designee) will make at least two attempts to contact the patient’s personal consultee via telephone. As in 4.2.2, the personal consultee will be provided with verbal overview of the trial and what participation would involve. The study investigator may email a copy of the consultee information sheet to the personal consultee. Once the personal consultee has had time to consider this information and the opportunity to ask questions, then they will be asked to verbally declare their approval for enrolment to proceed. This telephone conversation will be witnessed by a member of staff independent of the study team and documented both on the telephone declaration form and in the patient’s medical record.

**4.2.4 Consent to continue participation**

Once a patient has regained capacity, they will be approached by an authorised member of the site research team for informed deferred consent. A Participant Information Sheet (PIS) will be provided to the patient. The PIS will provide information about the purpose of the study, what participation means for the patient, confidentiality and data security, and the future availability of the trial results.

A Consent Form will be provided indicating that: the information given, orally and in writing, has been read and understood; participation is voluntary and can be withdrawn at any time without consequence; and that consent is given for access to medical records for data collection. The Consent Form will cover consent for use of data already collected for the trial, as well as ongoing data collection and follow-up.

Patients will be given time to read the PIS and have an opportunity to ask any questions they may have about participation in this trial. After verifying that the PIS and Consent Form are understood, the person seeking consent will invite the patient to sign the Consent Form and will then add their own name and countersign it. A copy will be given to the patient, a copy placed in the patient’s medical notes and the original kept in the Investigator Site File. If the patient is unable to physically sign the Consent Form (e.g. due to weakness or reduced dexterity), an independent witness can sign on their behalf.

**4.2.5 Withdrawal of consent**

If patient informed consent or consultee declaration is refused or withdrawn, this decision will be respected and abided by. All data up to the point of this decision will be retained in the trial, unless the patient or their consultee requests otherwise.

**4.3 Confirmation of eligibility and randomisation**

Once appropriate consent or consultee declaration to support enrolment has been obtained, an appropriately trained member of the research team will confirm eligibility in the patient’s medical record and proceed with randomisation. Randomisation will be performed using a web-based electronic portal via the Castor electronic data capture (EDC) system used for both randomisation and study data collection.

**4.4 Baseline assessments**

A complete schedule of events and assessments is shown in table 1. A member of the research team will collect baseline information about the participant’s medical history, demographics and physical examination as documented in their EPR. All data for this study will be manually transcribed by research staff from a participant’s medical record across to the Castor EDC. Baseline assessments will also include measurements taken via an ultrasound doppler scan of deep veins of the lower limbs, and where available, non-invasive measurements of cardiac output and associated haemodynamic indices.

**Table 1. Visit Schedule and Assessments**

| **Assessment period** | **Screening** | **Baseline** | **Intervention Period**  **(Up to day 10 or discharge from critical care)** | | | | | | | | | | **Long-term**  **Follow-up** |
| --- | --- | --- | --- | --- | --- | --- | --- | --- | --- | --- | --- | --- | --- |
| **Study Day** | **0** | **0** | **1** | **2** | **3** | **4** | **5** | **6** | **7** | **8** | **9** | **10** | **90** |
| Informed consent | X |  |  |  |  |  |  |  |  |  |  |  |  |
| Eligibility criteria | X |  |  |  |  |  |  |  |  |  |  |  |  |
| Randomisation |  | X |  |  |  |  |  |  |  |  |  |  |  |
| Demographics |  | X |  |  |  |  |  |  |  |  |  |  |  |
| Medical history & illness severity scores |  | X |  |  |  |  |  |  |  |  |  |  |  |
| Intervention |  | X | X | X | X | X | X | X | X | X | X | X |  |
| Vital signs |  | X | X | X | X | X | X | X | X | X | X | X |  |
| Physical exam |  | X |  |  |  |  | X |  |  |  |  |  |  |
| Ultrasound of lower limbs |  | X |  |  |  |  | X |  |  |  |  |  |  |
| Cardiac output monitoring |  | X | X | X |  |  |  |  |  |  |  |  |  |
| Blood sampling |  | X |  | X |  |  | X |  |  |  |  |  |  |
| Admission outcomes |  |  |  |  |  |  |  |  |  |  |  | X | X |
| Patient reported outcomes |  |  | X |  |  |  | X |  |  |  |  |  | X |

**4.5 Treatment Phase**

**4.5.1 Staff training**

Prior to commencing the trial, all members of the research and critical care scientist teams will be formally trained on all procedures applied in both the intervention and comparator arms. To ensure adherence to the intervention/comparator, training videos will be provided for bedside nurses caring for participants of this trial.

**4.5.2 Intervention arm**

Participants allocated to the intervention will have a gekoTM device fitted to each lower leg. Devices will be applied by research staff, critical care scientists or bedside nursing staff who have completed appropriate training for the device at this study. Each device will be activated and programmed to the appropriate output setting to provide visible dorsi-flexion of the respective foot, according to the manufacturers written instructions.

After one hour of satisfactory operation of the gekoTM devices, confirmation of ongoing effective twitch will be documented in the participant’s EPR by the bedside nurse. Each device will be replaced daily until the end of the treatment phase. If an awake patient is unable to tolerate the device or refuses cooperation with the intervention, this will be documented in the patients EPR and they will be asked to complete a short questionnaire on their experience and reasons for intolerance.

**4.5.3 Comparator arm**

Participants allocated to the comparator will receive intermittent pneumatic compression devices to each lower leg as described by current local VTE prophylaxis policy (see appendix 1).

**4.5.4 Other aspects of care**

All other aspects of critical care will proceed according to the treating physician’s discretion and local established protocols. This includes the prescription and administration of pharmacological VTE prophylaxis according to local policy and assessment of patients’ individual bleeding risk.

**4.6 End of treatment phase**

Patients will be deemed to have completed the treatment phase after 10 days following enrolment or at discharge from critical care (whichever comes sooner). Subject data will be collected at recruitment (baseline) and at patient follow-up (daily). All trial data will be manually transcribed from the participant’s EPR across to the study’s Castor EDC.

**5 Participant Completion and Withdrawal**

**5.1 Participant Completion**

Participants will have completed the study once all protocol related activities have been completed, including follow-up.

**5.2 Premature Withdrawal / Discontinuation from the Study**

Participants will be advised that they are free to withdraw from the study at any time for any reason or, if necessary, the Investigator may withdraw a subject from the study to protect the subject’s health. The Investigator may withdraw a subject from the study if it is considered that the scientific, and therefore, ethical standards of the study are compromised. Participants may also be withdrawn for not complying with study procedures. The reasons for withdrawal will be fully recorded in the trial specific Electronic Data Capture system.

**6 Study Treatments**

**6.1 Description of the Investigational Device**

The gekoTM device has regulatory approval for use in a human patient population for multiple indications in numerous countries (please refer to Appendix 2 for a list of regulatory approvals). The geko™ device is made from mylar (polyethylene terephthalate (PET)), it is enclosed in a polypropylene casing and a hydrogel layer will adhere to the skin.

**6.2 Participant Investigational Device Use**

FirstKind Ltd. have agreed to supply sufficient stock of the geko T3 device for all participants in the intervention arm. FirstKind Ltd. will also deliver a structured training programme for all clinical staff expected to apply the device to participants. FistKind will continue to provide technical support and ongoing responsibility for training and replacement of any deficient devices, in order to complete the objectives of this trial.

**6.3 Labelling**

The study supplies will be labelled in accordance with all applicable regulatory requirements.

**6.4 Device Storage, Handling, Application and Disposition**

All storage, handling and application of the Geko device will be according to the manufacturer’s approved written instructions. Moreover, there is no requirement or need to provide trial specific labelling, storage, handling, application, and disposal instructions.

**7 Data Collection**

**7.1 Routine Data: Demographics & Medical History**

For the purposes of this study, demographic information will include that which is routinely collected for all admissions to critical care, including:

- Age, gender
- Weight, height, body mass index
- Previous medical history, including any previous VTE or pre-disposing risk factor such as active cancer or recent immobility.
- History of presenting illness
- Drug history, including use of any anticoagulant or antiplatelet agents

**7.2 Study Specific Data**

Study specific data fields will include appropriate fields to fulfil the sponsor’s requirements, such as date and time of enrolment and details on valid consent. They will also include, but be limited to data essential to meeting the aims and objectives of this feasibility study and inform the future design and conduct of a future more definitive efficacy trial.

**8 Statistical Analysis**

**8.1 General Statistical Considerations**

This section presents general information concerning the statistical analyses which will be performed in this study, including for example, information about sample size, patient groups, endpoints, and the analysis to be performed.

**8.2 Sample Size Determination and Rationale**

Based on the design and objectives of this feasibility study, a formal sample size calculation is not appropriate. This trial is not powered to detect a clinically meaningful difference between the two treatment groups for any clinical outcome.(11) The primary objective for the study is to provide estimates of recruitment and retention of participants, whilst also assessing variability in the clinical outcomes measured to inform the sample size calculation for a future definitive randomised trial. Accordingly, the target is to recruit 40 participants in order to provide adequate assessment of feasibility outcomes in relation to progression to a more definitive trial.(12)

**8.3 Data Analysis**

**8.3.1 Feasibility Endpoints**

Success of this feasibility study and assessment on whether to pursue funding for a definitive randomised trial will be dependent on the endpoints described below. The thresholds by which feasibility will be defined are also detailed in a traffic light system in table 2.

**8.3.1.1 Successful effective application of the Geko:** This study will be one of the first to apply the Geko device in critically ill patients. Therefore, our primary endpoint will be the percentage of patients who able to tolerate effective application of the Geko, evidenced by bilateral twitching of their calf muscles. A predefined threshold of 70% or above would mark success of effective application of the intervention to trial participants. A rate of less than 70% might also be acceptable, if it can be improved with subsequent targeted training and support with the Geko’s bedside application for clinical staff.

**8.3.1.1 Recruitment rate:** Success will be defined as achievement of at least 80% of the recruitment target without any major modification of the study protocol. If the recruitment rate is in the range from 40-80% of the target, this may support a future trial if the rate can be improved through modifications of the study protocol, use of additional sites or both. Support for a future definitive trial would be unlikely if recruitment is below 40% of the target within the given time period; unless a clear need for additional and reasonable support for low recruiting sites is identified or specific solutions are available to overcome poor recruitment.

**8.3.1.2 Follow-up and Data Completeness:** Proof of feasibility will be defined as 95% completeness of datasets and follow-up. A patient will be considered to have complete data if all variables are collected up to the point of discharge from critical care or day 10 after enrolment (whichever comes sooner). Data completeness rates of 75-95% may also represent success if >90% of data for the likely primary outcome for the future definitive trial have been captured; or if provision of additional site training on dataset completion is required. If data completeness is below 75%, progression to a further trial would only be supported if there is a clear and realistic plan to improve compliance

| **Feasibility Assessment** | **Adherence to intervention** | **Recruitment rate**  **(% of predicted)** | **Data / follow-up completeness** |
| --- | --- | --- | --- |
| Green: Feasibility proven | >70% | >80% | >95% |
| Amber: Feasibility maybe proven with modification | 50-70% | 40-80% | 75-95% |
| Red: Unfeasible | <50% | <40% | <75% |

*Table 2. Traffic light model of endpoint thresholds used to define proof of feasibility.*

Green thresholds for the above variables would represent proof of feasibility and support a future funding application for a larger efficacy trial. Amber thresholds may still represent feasibility if they can be addressed and improved through modifications of the trial protocol or through other solutions such as staff training or device modification. Any feasibility outcomes measuring red would deem this study protocol unfeasible at scale, unless realistic and effective measures to address them can be identified.

**8.3.2 Secondary Endpoints**

Data will be examined for completeness and form. No imputation will take place for missing data, but quantities will inform future research. All data will be summarised descriptively for all timepoints with appropriate statistics or graphics. Continuous parameters will include mean, standard deviation (SD), median, interquartile range (IQR) minimum, and maximum. Categorical variables will include frequency counts, percentages and 95% binomial confidence intervals. Outcomes will also be summarised descriptively according to treatment group. As this is a feasibility study, significance testing will not be performed.

**9 Reporting of Adverse Events and Device Deficiencies**

**9.1 Adverse Event Reporting**

The Principal Investigator (or designee) is responsible for recording and reporting of adverse events (AEs) observed during the study. It is important that AEs in both the intervention and control arms are reported. The reporting period for AEs will run from the time of enrolment until day 10 or discharge from critical care (whichever comes sooner). AE definitions are shown in table 2.

*Table 2: Terms and Definitions for Adverse Events*

| **Term** | **Definition** |
| --- | --- |
| **Adverse Event**  **(AE)** | Any untoward medical occurrence in a participant to whom a study intervention has been administered, including occurrences which are not necessarily caused by or related to that product. |
| **Serious Adverse Event (SAE)** | Respectively, any adverse event, adverse reaction or unexpected adverse reaction that:   - results in death - is life-threatening - requires hospitalisation or prolongation of existing hospitalisation* - results in persistent or significant disability or incapacity - consists of a congenital anomaly or birth defect   ‘Important medical events’ may also be considered serious if they jeopardise the subject or require an intervention to prevent one of the above consequences. |

It is recognised that patients in critical care are at significant risk of suffering adverse events due to their underlying condition, rather than any study intervention. Any AE that occurs within 10-days of randomisation will be reported, regardless of whether it is deemed to be related to the study intervention or not. Other events (unless deemed serious) occurring as a result of the patient’s underlying condition or co-morbidity will not be reported as an AE. Once the Investigator becomes aware of a device related adverse event that is considered severe, they must report this to the Sponsor within 24 hours of becoming aware of it.

All AEs will be recorded in the study CRF as described above and discussed at regular trial management group meetings. The report must include a full description of the event. Additional supporting documentation may be requested and should be provided to Sponsor as and when it becomes available. Such documentation includes but is not limited to lab reports, electrocardiogram [ECG] reports, discharge summary, hospital notes, etc.

The Investigator is also responsible for reporting all SAEs to the appropriate Review Board (Institutional Review Board/Independent Ethics Committee [IRB/IEC]) or in accordance with local laws and regulations. The Investigator is responsible for maintaining documentation in the study file that indicates the IRB/IEC has been properly notified.

Any Device Deficiencies (DD) will be reported to Firstkind Ltd. who agree to provide technical assistance, including replacement of faulty devices as required to complete the study.

**9.2 Assessment of Adverse Events**

The PI (or designee) will be responsible for assessment of an AE’s severity, causality and expectedness. Every reportable AE will be assessed for its severity and graded according to the criteria laid out in table 3.

*Table 3: Grading of severity for adverse events*

| **Category** | **Condition** |
| --- | --- |
| **Mild** | AE does not interfere with participant’s daily routine, does not require intervention, may cause slight discomfort |
| **Moderate** | The AE interferes with some aspects of participant’s routine, or requires intervention, but is not damaging to health, cause moderate discomfort |
| **Severe** | AE results in alteration, discomfort or disability which is clearly damaging to health |
| **Life threatening** | AE has life-threatening consequences, urgent intervention required |
| **Fatal** | AE results in participant’s death |
|  | |

The PI will also be responsible for assessment of an AE’s causality and expectedness as outlined by the classification system in table 4. Any AE which is possibly, probably or definitely related to the study intervention will be reported as related. The evaluation of an AE’s expectedness should be performed in conjunction with the list of expected adverse events in Appendix 2.

*Table 4: Assessment of causality for adverse events. * e.g. event related to the patient’s clinical condition or other concomitant treatments*

| **Relationship to study intervention** | **Description** |
| --- | --- |
| **Definitely** | There is clear evidence to suggest a causal relationship, and other possible contributing factors can be ruled out. |
| **Probably** | There is evidence to suggest a causal  relationship, and the influence of other  factors is unlikely |
| **Possibly** | There is some evidence to suggest a causal relationship. However, the influence of other factors may have contributed to the event* |
| **Unlikely** | There is little evidence to suggest there is a causal relationship. There is another reasonable explanation for the event* |
| **Not related** | There is no evidence of any causal  relationship. |
| **Not Assessable** | Unable to assess on information available. |

**9.3 Follow-up of Adverse Events**

All related AEs and SAEs will be followed-up by the PI (or designee) until they are resolved or confidently determined to be unrelated to any study procedure. The time and date of this resolution should be documented in the CRF. Each TMG teleconference will discuss AEs as a standing agenda item.

**10 Direct Access to Source Data/Documentation**

All study source data will be located in the site’s EPR. An enrolment log of participants and their hospital identifiers will be kept securely by the research team. Only appropriately trained and delegated members of the research team will have access to this log. The enrolment log will generate a unique study number for each participant, which can then be used in the Castor EDC. No personal identifiers will be disclosed to the funders or any third party, nor used in any publication or communication related to this study. The participant’s study number may be used if it becomes necessary to identify data specific to a single participant for safety or scientific reasons.

The monitors, auditors, personnel authorised by the Sponsor, the local NHS REC, and regulatory agencies are eligible to review medical and research records related to this study as a part of their responsibility to protect human participants in clinical research and will be given direct access to source data and documentation (e.g., medical charts/records, printouts etc.) for source data verification, provided that participant confidentiality is maintained in accordance with local requirements. Access to a participant’s EPR may be governed by institution policy research staff will be required to ensure access while remaining compliant with our institutional requirements.

**11 Quality Control and Assurance**

**11.1 Monitoring Requirements**

The study will be subject to the audit and monitoring regime of Manchester University NHS Foundation Trust in line with applicable MFT SOPs and policies. The study will have, as a minimum, an annual survey sent out for completion by a member of the research team.

**11.2 Regulatory Approvals, amendments and compliance**

**11.2.1 Regulatory NHS Approvals**

- Before the start of the study, a favourable opinion will be sought from a REC for the study protocol, informed consent forms and other relevant documents e.g. advertisements.
- Substantial amendments that require review by NHS REC will not be implemented until that review is in place and other mechanisms are in place to implement at site.
- All correspondence with the REC will be retained.
- It is the Chief Investigator’s responsibility to produce the annual reports as required.
- The Chief Investigator will notify the REC of the end of the study.
- An annual progress report (APR) will be submitted to the REC within 30 days of the anniversary date on which the favourable opinion was given, and annually until the study is declared ended.
- If the study is ended prematurely, the Chief Investigator will notify the REC, including the reasons for the premature termination.
- Within one year after the end of the study, the Chief Investigator will submit a final report with the results, including any publications/abstracts, to the REC.

**11.2.2 Compliance**

- Before any site can enrol patients into the study, the Chief Investigator/Principal Investigator or designee will ensure that appropriate approvals from participating organisations are in place.
- For any amendment to the study, the Chief Investigator or designee, in agreement with the sponsor will submit information to the appropriate body in order for them to issue approval for the amendment. The Chief Investigator or designee will work with sites so they can put the necessary arrangements in place to implement the amendment to confirm their support for the study as amended.

**11.2.3 Amendments**

- The study team and or Sponsor may identify the need for an amendment to the study protocol, procedures or documents etc.
- The research will complete the amendment tool and update and necessary documents and forward to the Sponsor representative for review and signature. Once approved by the Sponsor the research team can submit the amendment via IRAS for REC and/or HRA review.
- Amendments will be tracked using the document history/ control log template.
- Once amendments have been approved by the regulatory agencies, the Sponsor will issue no objection if they are happy with the amendment and the research team can implement the amendment at site.

**11.4 Reporting Protocol Deviations**

- Accidental protocol deviations can happen at any time. They must be adequately documented on the relevant forms and reported to the Chief Investigator and Sponsor immediately.
- Deviations from the protocol which are found to frequently recur are not acceptable, will require immediate action and could potentially be classified as a serious breach and must reported the Sponsor immediately. Potential serious breaches will be assessed by the Sponsor and they will determine and action if anything constitutes a serious breach.

**12 Ethics and Regulatory Requirements**

This study is to be conducted in accordance with the specifications of this protocol and in accordance with principles consistent with Declaration of Helsinki, Good Clinical Practice (GCP) and currently applicable regulations.

No protocol changes will be implemented without the prior review and approval of the relevant ethics committee, except where it may be necessary to eliminate an immediate hazard to a research participant (See Section 13.1).

Additionally, all study products used in this study are manufactured, handled and stored in accordance with applicable Good Manufacturing Practices (GMP) and the products provided for this study will be used only in accordance with this protocol.

**12.1 Research Ethics Committee Approval**

This trial will require formal review and approval by an NHS research ethics committee (REC). We will specifically apply to a REC in England that is experienced and capable of approving research involving participants who lack capacity to consent. The CI will take responsibility for completing the REC application. Applications to the REC and the relevant NHS R&D departments will be made through the Integrated Research Application System (IRAS). This trial will be registered with the ClinicalTrials.gov registry.

**12.2 Investigator’s Responsibilities**

The Investigators are responsible for performing the study in full accordance with the specifications of this protocol and in accordance with principles consistent with Declaration of Helsinki, Good Clinical Practice (GCP) and current applicable regulations. Information regarding any study centres participating in this study that cannot comply with these standards will be documented.

**13 Data Handling and Record Keeping**

**13.1 Recording and Collection of Data**

The primary source document for this study will be the participant's medical record. If separate research records are maintained by the Investigator(s), the medical record and the research records will be considered the source documents for the purposes of auditing the study.

Applicable source data will be manually transcribed to the Castor EDC system. The Investigator is ultimately responsible for the accuracy of the data transcribed into Castor EDC. All source documents and eCRFs within Castor EDC will be completed as soon as possible after the participant's visit.

The Principal Investigator (PI) will review data entered into Castor EDC to indicate that, to his/her knowledge, they are complete and accurate. If further changes are made after this, the PI will need to again sign the Investigator signature page. Designated source documents will be signed and dated by the appropriate study personnel. Investigators must agree to complete and maintain both source documents and Castor EDC system for each participant in the study.

**13.2 Sharing of Study Data**

A de-identified copy of the study data will be made available to FirstKind from the Castor EDC database. At no point will FirstKind or any third party outside of our NHS trust have access to any participants’ personal data.

**13.3 Archiving**

All study documentation at the Study site and Sponsor site will be archived in accordance with Sponsor’s quality standards and SOPs.

The Study site will maintain all research records, reports, and case history reports for a period of 10 years after study closure.

At the completion of the study, details of the archival process must be provided to the Sponsor. Study records are subject to inspection by applicable health and regulatory agencies at any time.

Records to be retained at the Study site include, but are not restricted to:

- Source data and the primary records upon which they are based (e.g., participant’s progress notes, adverse event data, test results, and any other diagnostic procedures required to evaluate the progress of the study).
- Signed protocols and protocol amendments
- Product accountability records
- Study personnel signature log
- Monitoring logs
- Correspondence to and from the Sponsor, designee and IRB/IEC
- Principal Investigator and co-Investigator(s) Curriculum Vitae (CVs)
- Signed ICFs
- SAE reports
- Other documents pertaining to the conduct of the study

These documents must be maintained and kept on file by the Study site so that the conduct of the study can be fully documented and monitored.

**13.4 Indemnity**

The NHS indemnity scheme will apply to this study to ensure it meets the potential legal liability of the sponsor, equipment, employer and investigators/collaborators for harm to participants arising from the management, design and conduct of the research. No arrangements will be made for the payment of compensation in the unlikely event of harm.

**13.5 Dissemination of results**

This project will provide data for publications on the following areas; feasibility of the study protocol and potential for a larger efficacy trial, exploration into the Geko’s effects beyond reduction of VTE risk and the financial and environmental costs of the Geko device compared to other methods of VTE prophylaxis. Our results will be presented to researchers locally in Manchester, as well as at both national and international scientific conferences/meetings.

The patient information sheet for consenting patients details that the results will be shared to participants who would like to receive a copy. This will be done via the contact details provided on the consent form.

**References**

1. McLeod AG, Geerts W. Venous thromboembolism prophylaxis in critically ill patients. Crit Care Clin. 2011;27(4):765-80, v.

2. Hirsch DR, Ingenito EP, Goldhaber SZ. Prevalence of deep venous thrombosis among patients in medical intensive care. JAMA. 1995;274(4):335-7.

3. Malas MB, Naazie IN, Elsayed N, Mathlouthi A, Marmor R, Clary B. Thromboembolism risk of COVID-19 is high and associated with a higher risk of mortality: A systematic review and meta-analysis. EClinicalMedicine. 2020;29:100639.

4. A. C. Written Evidence from the Select Committee on Health.: UK Parliamentary Business & Publications.; 2005.

5. Shalhoub J, Lawton R, Hudson J, Baker C, Bradbury A, Dhillon K, et al. Graduated compression stockings as adjuvant to pharmaco-thromboprophylaxis in elective surgical patients (GAPS study): randomised controlled trial. BMJ. 2020;369:m1309.

6. Arabi YM, Al-Hameed F, Burns KEA, Mehta S, Alsolamy SJ, Alshahrani MS, et al. Adjunctive Intermittent Pneumatic Compression for Venous Thromboprophylaxis. N Engl J Med. 2019;380(14):1305-15.

7. Tucker A, Maass A, Bain D, Chen LH, Azzam M, Dawson H, et al. Augmentation of venous, arterial and microvascular blood supply in the leg by isometric neuromuscular stimulation via the peroneal nerve. Int J Angiol. 2010;19(1):e31-7.

8. Camuglia AC, Alemayehu M, McLellan A, Wall S, Abu-Romeh N, Lavi S. The Impact of Peripheral Nerve Stimulation on Coronary Blood Flow and Endothelial Function. Cardiovasc Drugs Ther. 2015;29(6):527-33.

9. Jawad H, Bain DS, Dawson H, Crawford K, Johnston A, Tucker A. The effectiveness of a novel neuromuscular electrostimulation method versus intermittent pneumatic compression in enhancing lower limb blood flow. J Vasc Surg Venous Lymphat Disord. 2014;2(2):160-5.

10. Wainwright TW, Burgess LC, Middleton RG. A feasibility randomised controlled trial to evaluate the effectiveness of a novel neuromuscular electro-stimulation device in preventing the formation of oedema following total hip replacement surgery. Heliyon. 2018;4(7):e00697.

11. Thabane L, Ma J, Chu R, Cheng J, Ismaila A, Rios LP, et al. A tutorial on pilot studies: the what, why and how. BMC Med Res Methodol. 2010;10:1.

12. Lancaster GA, Dodd S, Williamson PR. Design and analysis of pilot studies: recommendations for good practice. J Eval Clin Pract. 2004;10(2):307-12.

**Appendices**

Appendix 1. Local Policy for VTE Prophylaxis (standard care arm)

Appendix 2. List of Expected Adverse Events
